# Supplementary material for: Serum HPV16 E7 Oncoprotein Is a Recurrence Marker of Oropharyngeal Squamous Cell Carcinomas
Source: MDPI journal article supplement (doi:10.3390/cancers13133370), 2021-07-05
Supplement: s1 [file s1]

# Supplementary Materials: Serum HPV16 E7 Oncoprotein Is a Recurrence Marker of Oropharyngeal Squamous Cell Carcinomas

Lucia Oton-Gonzalez, John Charles Rotondo, Carmen Lanzillotti, Elisa Mazzoni, Ilaria Bononi, Maria Rosa Iaquinta, Luca Cerritelli, Nicola Malagutti, Andrea Ciorba, Chiara Bianchini, Stefano Pelucchi, Mauro Tognon and Fernanda Martini

**Table S1.** Validated primer sets used in qPCR to detect and quantify HPV DNA and both, viral and cellular genes.

|            | Target   | Primers Names            | Primers Sequence (5'→ 3')                          | Amplicon Size (bp) | Annealing Temp. (°C) | Reference |
|------------|----------|--------------------------|----------------------------------------------------|--------------------|----------------------|-----------|
| <b>DNA</b> |          |                          |                                                    |                    |                      |           |
| Viral      | HPV L1   | GP5+<br>GP6+             | TTTGTTACTGTGGTAGATAC<br>GAAAAATAAACTGTAAATCA       | 139–145            | 48                   | [1]       |
| Host       | β-Globin | β-Globin F<br>β-Globin R | TGGGTTTCTGATAGGCACTGACT<br>AACAGCATCAGGAGTGGACAGAT | 152                | 56                   | [2]       |
| <b>RNA</b> |          |                          |                                                    |                    |                      |           |
| Viral      | HPV16 E7 | E7 FWD<br>E7 REV         | AGGAGGATGAAATAGATGGTCCAG<br>CTTTGTACGCACAACCGAAGC  | 112                | 60                   | [3]       |
| Host       | p16      | p16 FWD<br>p16 REV       | CCAACGCACCGAATAGTTACG<br>GCGCTGCCCATCATCATG        | 58                 | 60                   | [4]       |
|            |          | GAPDH F<br>GAPDH R       | GAAGGTGAAGGTCCGAGTC<br>GAAGATGGTGATGGGATTTC        | 226                | 60                   | [5]       |

## Supplementary Materials References:

1. Malagutti, N.; Rotondo, J.C.; Cerritelli, L.; Melchiorri, C.; De Mattei, M.; Selvatici, R.; Oton-Gonzalez, L.; Stomeo, F.; Mazzoli, M.; Borin, M.; et al. High Human Papillomavirus DNA loads in Inflammatory Middle Ear Diseases. *Pathog.* **2020**, *9*, 224, doi:10.3390/pathogens9030224.
2. Martone, T.; Gillio-Tos, A.; De Marco, L.; Fiano, V.; Maule, M.M.; Cavalot, A.L.; Garzaro, M.; Merletti, F.; Cortesina, G. Association Between Hypermethylated Tumor and Paired Surgical Margins in Head and Neck Squamous Cell Carcinomas. *Clin. Cancer Res.* **2007**, *13*, 5089–5094, doi:10.1158/1078-0432.ccr-07-0119.
3. Pett, M.R.; Herdman, M.T.; Palmer, R.D.; Yeo, G.S.H.; Shivji, M.K.; Stanley, M.A.; Coleman, N. Selection of cervical keratinocytes containing integrated HPV16 associates with episome loss and an endogenous antiviral response. *Proc. Natl. Acad. Sci.* **2006**, *103*, 3822–3827, doi:10.1073/pnas.0600078103.
4. Marcoux, S.; Le, O.N.L.; Langlois-Pelletier, C.; Laverdière, C.; Hatami, A.; Robaey, P.; Beauséjour, C.M. Expression of the senescence marker p16INK4a in skin biopsies of acute lymphoblastic leukemia survivors: a pilot study. *Radiat. Oncol.* **2013**, *8*, 252, doi:10.1186/1748-717x-8-252.
5. Xiao, Z.; Liu, Q.; Mao, F.; Wu, J.; Lei, T. TNF-α-Induced VEGF and MMP-9 Expression Promotes Hemorrhagic Transformation in Pituitary Adenomas. *Int. J. Mol. Sci.* **2011**, *12*, 4165–4179, doi:10.3390/ijms12064165.
